# Supplementary material
Source: PubMed Central journal article supplement (PMC3651270)
Supplement: NIHMS61982-supplement-si20061011_101.pdf [file NIHMS61982-supplement-si20061011_101.pdf]

Supplemental Table 1.

|                                                                                                                     |                                  | P/Zn   | S/Zn   | Ca/Zn  | Ti/Zn    |
|---------------------------------------------------------------------------------------------------------------------|----------------------------------|--------|--------|--------|----------|
| Probability of statistical significance of variation between median values                                          |                                  | 0.6577 | 0.4331 | 0.8304 | <0.0001* |
| Kruskal-Wallis Statistic (Nonparametric ANOVA)                                                                      |                                  | 0.8381 | 1.673  | 0.3717 | 21.979*  |
| Probability of statistical significance of mean ranks difference by Dunn's Multiple comparison test done for pairs: | Nanoparticles vs nucleolus NC    | >0.05  | >0.05  | >0.05  | <0.001*  |
|                                                                                                                     | Nanoparticles vs mitochondria NC | >0.05  | >0.05  | >0.05  | <0.01*   |
|                                                                                                                     | Nucleolus NC vs mitochondria NC  | >0.05  | >0.05  | >0.05  | >0.05    |

\* indicates a statistically significant value.
